# Supplementary material for: Meckel’s Diverticulum: The “Great Mimic” but Often a Forgotten Cause of Acute Abdomen during Pregnancy
Source: Hindawi journal article supplement (doi:10.1155/2022/2383075), 2022-06-07
Supplement: f1 [file 2383075.f1.pdf]

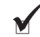

| Topic                           | Item | Checklist item description                                                                                       | Reported on Line                                                    |
|---------------------------------|------|------------------------------------------------------------------------------------------------------------------|---------------------------------------------------------------------|
| <b>Title</b>                    | 1    | The diagnosis or intervention of primary focus followed by the words "case report" . . . . .                     | 1                                                                   |
| <b>Key Words</b>                | 2    | 2 to 5 key words that identify diagnoses or interventions in this case report, including "case report" . . . . . | 10                                                                  |
| <b>Abstract (no references)</b> | 3a   | Introduction: What is unique about this case and what does it add to the scientific literature? . . . . .        | 13, 14                                                              |
|                                 | 3b   | Main symptoms and/or important clinical findings . . . . .                                                       | 15, 16                                                              |
|                                 | 3c   | The main diagnoses, therapeutic interventions, and outcomes . . . . .                                            | 17, 18                                                              |
|                                 | 3d   | Conclusion—What is the main "take-away" lesson(s) from this case? . . . . .                                      | 1, 2                                                                |
| <b>Introduction</b>             | 4    | One or two paragraphs summarizing why this case is unique ( <b>may include references</b> ) . . . . .            | 25, 26                                                              |
| <b>Patient Information</b>      | 5a   | De-identified patient specific information. . . . .                                                              | 29                                                                  |
|                                 | 5b   | Primary concerns and symptoms of the patient . . . . .                                                           | 30, 31                                                              |
|                                 | 5c   | Medical, family, and psycho-social history including relevant genetic information . . . . .                      | 32, 33                                                              |
|                                 | 5d   | Relevant past interventions with outcomes . . . . .                                                              | -                                                                   |
| <b>Clinical Findings</b>        | 6    | Describe significant physical examination (PE) and important clinical findings. . . . .                          | 35-37                                                               |
| <b>Timeline</b>                 | 7    | Historical and current information from this episode of care organized as a timeline . . . . .                   | -                                                                   |
| <b>Diagnostic Assessment</b>    | 8a   | Diagnostic testing (such as PE, laboratory testing, imaging, surveys). . . . .                                   | 37-41, 46                                                           |
|                                 | 8b   | Diagnostic challenges (such as access to testing, financial, or cultural) . . . . .                              | 82-86, 100                                                          |
|                                 | 8c   | Diagnosis (including other diagnoses considered) . . . . .                                                       | 48-50                                                               |
|                                 | 8d   | Prognosis (such as staging in oncology) where applicable . . . . .                                               | -                                                                   |
| <b>Therapeutic Intervention</b> | 9a   | Types of therapeutic intervention (such as pharmacologic, surgical, preventive, self-care) . . . . .             | 43, 52, 53                                                          |
|                                 | 9b   | Administration of therapeutic intervention (such as dosage, strength, duration) . . . . .                        | -                                                                   |
|                                 | 9c   | Changes in therapeutic intervention (with rationale) . . . . .                                                   | 52, 53                                                              |
| <b>Follow-up and Outcomes</b>   | 10a  | Clinician and patient-assessed outcomes (if available) . . . . .                                                 | 53, 54, 60                                                          |
|                                 | 10b  | Important follow-up diagnostic and other test results . . . . .                                                  | 59                                                                  |
|                                 | 10c  | Intervention adherence and tolerability (How was this assessed?) . . . . .                                       | -                                                                   |
|                                 | 10d  | Adverse and unanticipated events . . . . .                                                                       | 52                                                                  |
| <b>Discussion</b>               | 11a  | A scientific discussion of the strengths AND limitations associated with this case report . . . . .              | 67,68, 141, 142                                                     |
|                                 | 11b  | Discussion of the relevant medical literature <b>with references</b> . . . . .                                   | 67,68                                                               |
|                                 | 11c  | The scientific rationale for any conclusions (including assessment of possible causes) . . . . .                 | 145-151                                                             |
|                                 | 11d  | The primary "take-away" lessons of this case report (without references) in a one paragraph conclusion . . . . . | 156-161                                                             |
| <b>Patient Perspective</b>      | 12   | The patient should share their perspective in one to two paragraphs on the treatment(s) they received . . . . .  | -                                                                   |
| <b>Informed Consent</b>         | 13   | Did the patient give informed consent? Please provide if requested . . . . .                                     | Yes <input checked="" type="checkbox"/> No <input type="checkbox"/> |

## PATIENT INFORMED CONSENT

I \_\_\_\_\_, give my consent for the clinic information/photographs about myself relating to my disease/medical condition to appear in the journal, associated publications or translations or those to whom the journal licences its content. I have not seen the material to be submitted to the journal.

I understand the following:

(1). Use of this consent form does not waive your right to privacy. The Information will be published without your name attached. You should understand, however, that complete anonymity cannot be guaranteed. It is possible that somebody somewhere, for example somebody who looked after you when in hospital or a relative, may identify you.

(2). The text of the article will be edited for style, grammar, consistency, and length.

(3). The Information may be published in the journal, which is online and freely accessible worldwide to both health professionals, journalists, the public and others. The material may subsequently be used in other presentations at seminars or conferences, etc.

(4). You can revoke your consent at any time before publication, but once the Information has been committed to publication it will not be possible to revoke the consent.

(5). Patient and their family should note, they cannot normally expect to derive any financial benefit from the publication of the case.

(6). An original of the signed form will be held at the treating institution and the authors may be required to prove that consent was obtained.

(7). The author attests that an informed consent process was followed when this form was completed, with the patient sufficient time to consider its implications.

(8). This consent must be signed in English and Portuguese.

Name \_\_\_\_\_ (patient):

Signed (patient): \_\_\_\_\_ Date: \_\_\_\_\_

Name \_\_\_\_\_ (author):

Signed (author): \_\_\_\_\_ Date: \_\_\_\_\_

## PATIENT INFORMED CONSENT

I Daria Migotina Rodrigues, give my consent for the clinic information/photographs about myself relating to my disease/medical condition to appear in the journal, associated publications or translations or those to whom the journal licences its content. I have not seen the material to be submitted to the journal.

I understand the following:

- (1). Use of this consent form does not waive your right to privacy. The Information will be published without your name attached. You should understand, however, that complete anonymity cannot be guaranteed. It is possible that somebody somewhere, for example somebody who looked after you when in hospital or a relative, may identify you.
- (2). The text of the article will be edited for style, grammar, consistency, and length.
- (3). The Information may be published in the journal, which is online and freely accessible worldwide to both health professionals, journalists, the public and others. The material may subsequently be used in other presentations at seminars or conferences, etc.
- (4). You can revoke your consent at any time before publication, but once the Information has been committed to publication it will not be possible to revoke the consent.
- (5). Patient and their family should note, they cannot normally expect to derive any financial benefit from the publication of the case.
- (6). An original of the signed form will be held at the treating institution and the authors may be required to prove that consent was obtained.
- (7). The author attests that an informed consent process was followed when this form was completed, with the patient sufficient time to consider its implications.
- (8). This consent must be signed in English and Portuguese.

Name (patient): Daria Migotina Rodrigues  
Signed (patient): 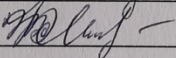 Date: 23.03.2021

Name (author): Beatriz Dias Cordoso Fena  
Signed (author): Beatriz Tólvic Date: 23/3/21
